# Supplementary material
Source: publisher figshare collection journal article supplement (https://tandf.figshare.com/articles/dataset/_/12981944)
Supplement: Supplementary file 1 [file 1]

## SUPPLEMENTARY INFORMATION

### **Phthalocyanine complexes with (4-isopropylbenzyl)oxy substituents: Preparation and evaluation of anti-carbonic anhydrase, anticholinesterase enzymes, and molecular docking studies**

Emre Güzel<sup>a\*</sup>, Ümit M. Koçyiğit<sup>b\*</sup>, Parham Taslimi<sup>c</sup>, İlhami Gülçin<sup>d</sup>, Sultan Erkan<sup>e</sup>

Mehmet Nebioğlu<sup>f</sup>, Barış S. Arslan<sup>f</sup>, İlkay Şişman<sup>f</sup>

<sup>a</sup>Department of Fundamental Sciences, Sakarya University of Applied Sciences, Sakarya, Turkey

<sup>b</sup>Department of Basic Pharmaceutical Sciences, Cumhuriyet University, Sivas, Turkey

<sup>c</sup>Department of Biotechnology, Bartın University, Bartın, Turkey

<sup>d</sup>Department of Chemistry, Atatürk University, Erzurum, Turkey

<sup>e</sup>Department of Chemistry and Chemical Processing Technologies, Yıldızeli Vocational School,  
Cumhuriyet University, Sivas, Turkey

<sup>f</sup>Department of Chemistry, Sakarya University, Sakarya, Turkey

\*Corresponding authors

\* Assoc. Prof. Dr. Emre GÜZEL

<sup>a</sup>Sakarya University of Applied Science  
Department of Fundamental Sciences  
Sakarya, Turkey  
E-Mail: [eguzel@subu.edu.tr](mailto:eguzel@subu.edu.tr)

\*Assoc. Prof. Dr. Ümit M. KOÇYİĞİT

<sup>b</sup>Cumhuriyet University,  
Department of Basic Pharmaceutical Sciences,  
Sivas, Turkey  
E-mail: [ukocyigit@cumhuriyet.edu.tr](mailto:ukocyigit@cumhuriyet.edu.tr)

## Table of Contents

|                                                                                        |    |
|----------------------------------------------------------------------------------------|----|
| <b>Figure S1.</b> FT-IR spectrum of cobalt phthalocyanine complex (4).....             | S3 |
| <b>Figure S2.</b> MALDI-TOF Mass spectrum of cobalt phthalocyanine complex (4).....    | S3 |
| <b>Figure S3.</b> FT-IR spectrum of copper phthalocyanine complex (5).....             | S4 |
| <b>Figure S4.</b> MALDI-TOF Mass spectrum of copper phthalocyanine complex (5). ....   | S4 |
| <b>Figure S5.</b> FT-IR spectrum of manganese phthalocyanine complex (6).....          | S5 |
| <b>Figure S6.</b> MALDI-TOF Mass spectrum of manganese phthalocyanine complex (6)..... | S5 |

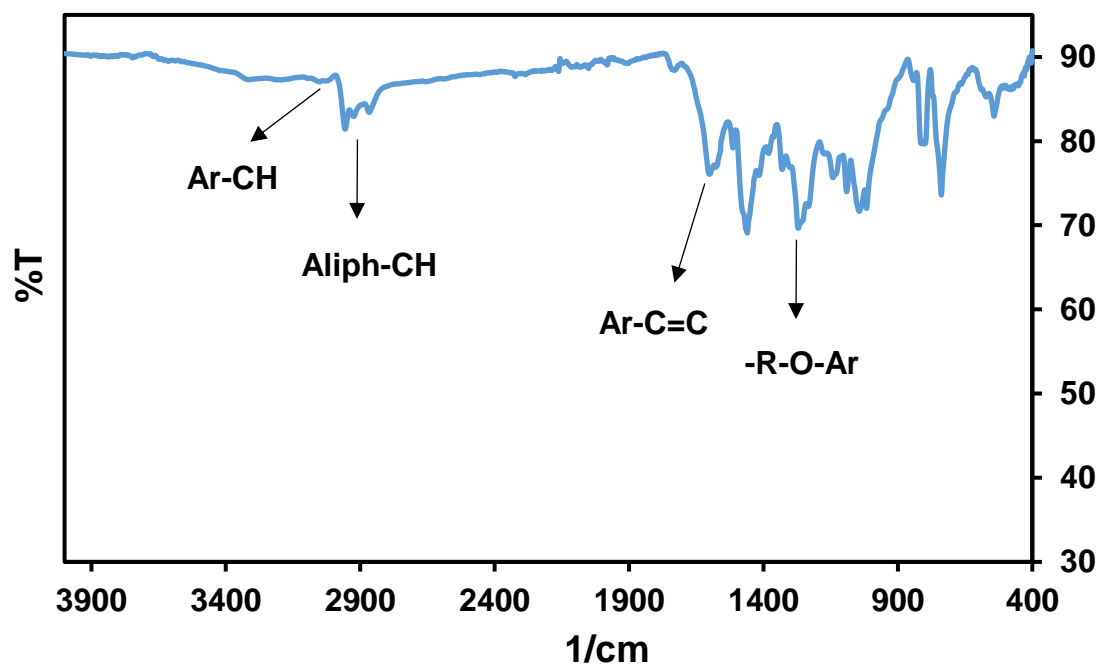

**Figure S1.** FT-IR spectrum of cobalt phthalocyanine complex (4).

CoPc\_iso3(4)\_DIT

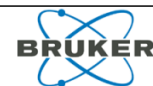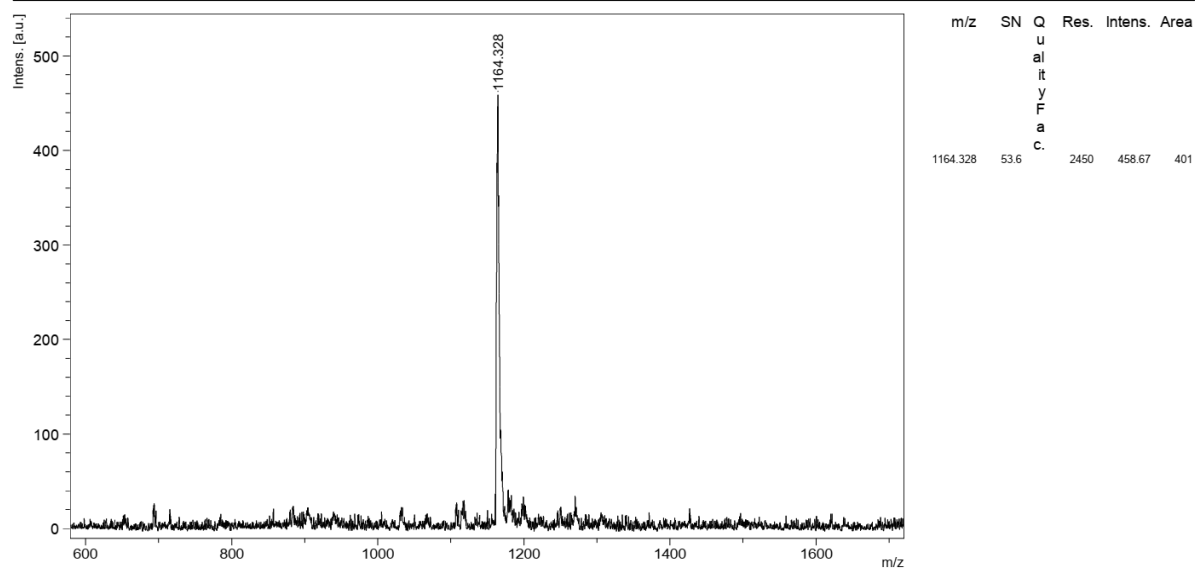

**Figure S2.** MALDI-TOF Mass spectrum of cobalt phthalocyanine complex (4).

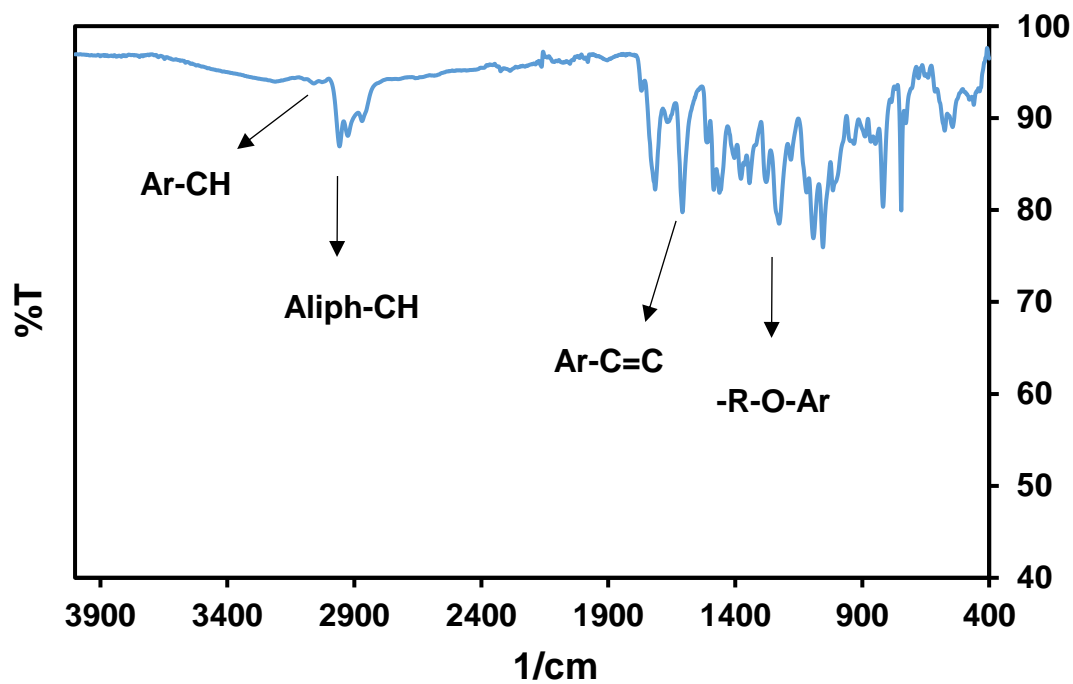

**Figure S3.** FT-IR spectrum of copper phthalocyanine complex (5).

CuPc\_iso3(5)\_DIT

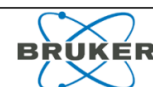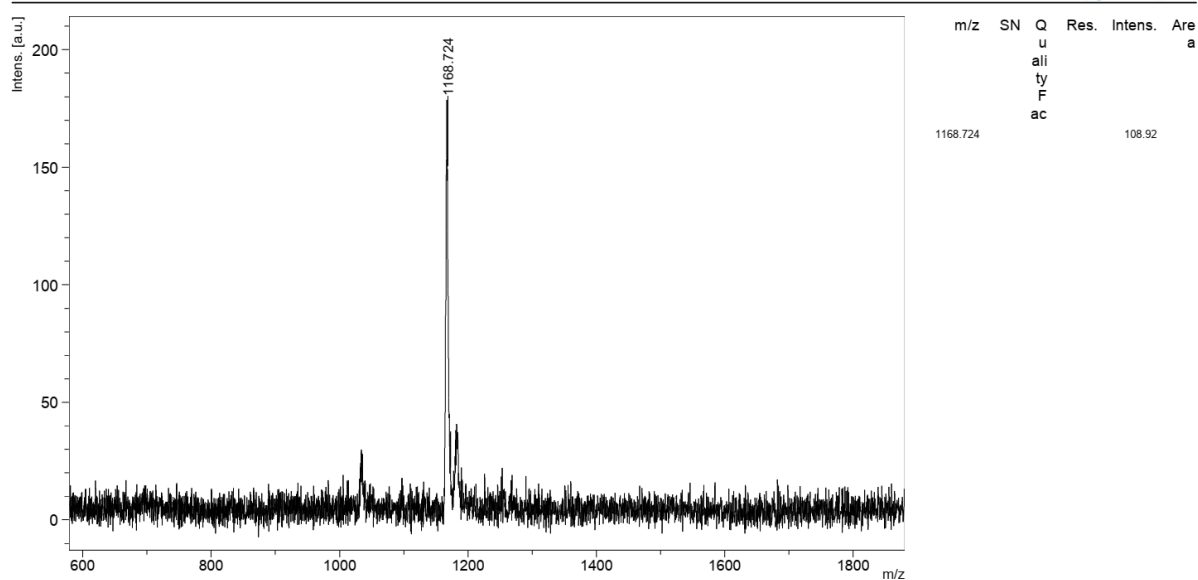

**Figure S4.** MALDI-TOF Mass spectrum of copper phthalocyanine complex (5).

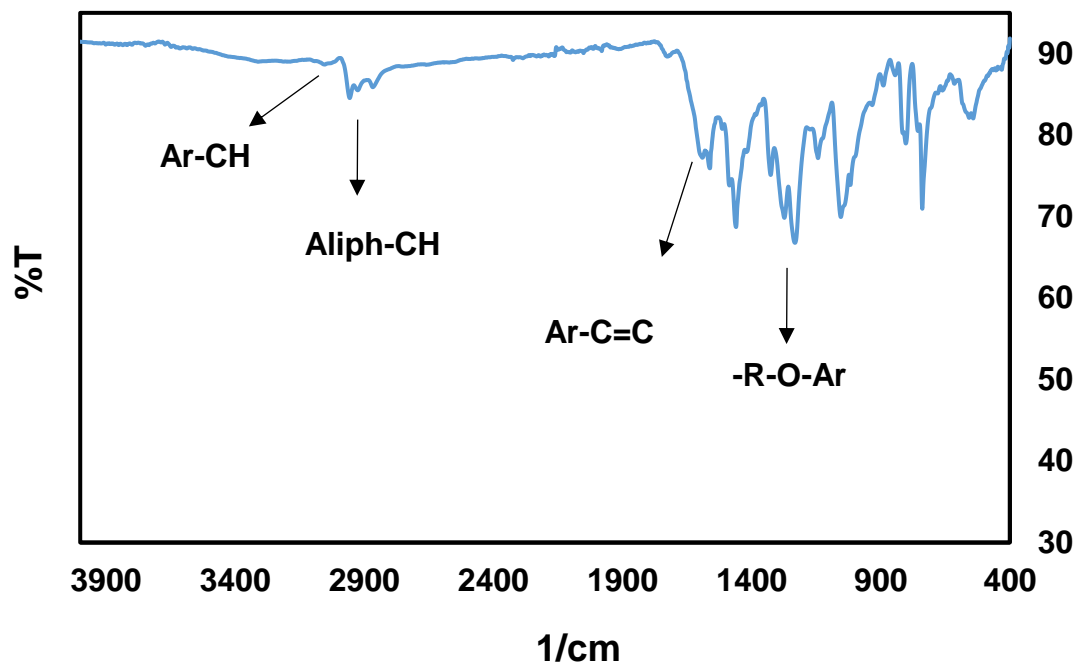

**Figure S5.** FT-IR spectrum of manganese phthalocyanine complex (6).

MnPc\_iso3(6)\_DIT

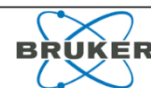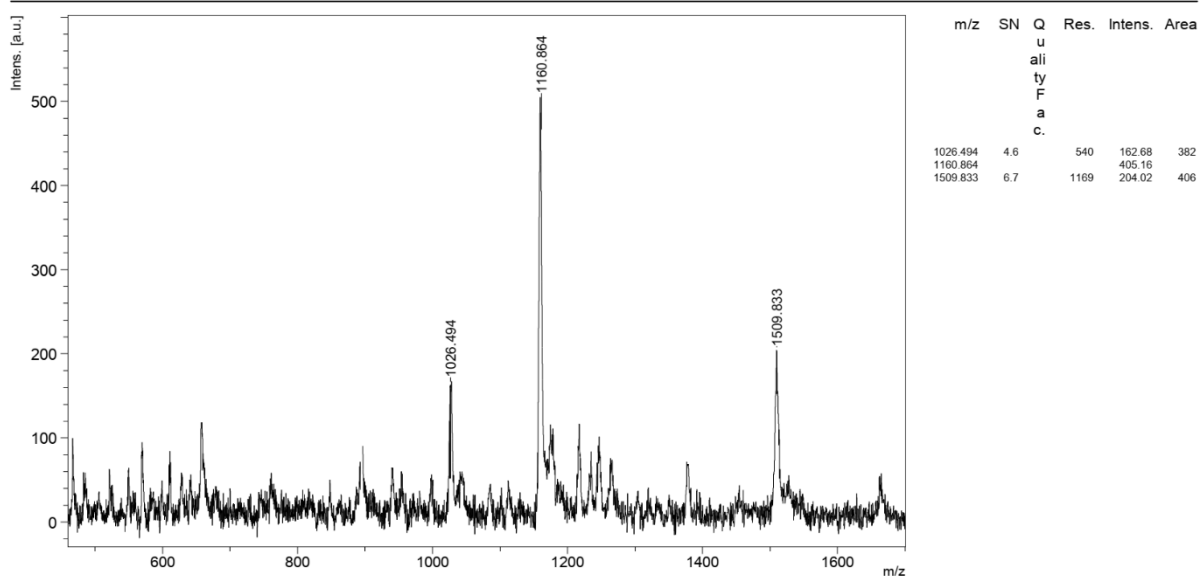

**Figure S6.** MALDI-TOF Mass spectrum of manganese phthalocyanine complex (6).
